# Supplementary material for: Clinical features and long-term outcomes of interstitial lung disease with anti-neutrophil cytoplasmic antibody
Source: PubMed Central journal article supplement (PMC7968287; doi:10.1186/s12890-021-01451-4), 2021-03-16

1 **Clinical features and long-term outcomes of interstitial lung disease with anti-neutrophil**

2 **cytoplasmic antibody**

3

4 Xin Sun<sup>1\*</sup>, Min Peng<sup>1\*</sup>, Ting Zhang<sup>1</sup>, Zongru Li<sup>2</sup>, Lan Song<sup>3</sup>, Mengtao Li<sup>4</sup>, Juhong Shi<sup>1</sup>

5 \*These authors contributed equally to this work.

6

7 **CORRESPONDENCE AUTHOR**

8 Juhong Shi, M.D., Department of Respiratory and Critical Care Medicine, Peking Union

9 Medical College Hospital, Chinese Academy of Medical Science & Peking Union Medical

10 College, No. 1 Shuai Fu Yuan, Dongcheng District, Beijing 100730, China

11 Tel: 86-13701178492

12 Fax: 86-10-69155028

13 E-mail: [shijh@pumch.cn](mailto:shijh@pumch.cn)

14

15

16

17

18

19

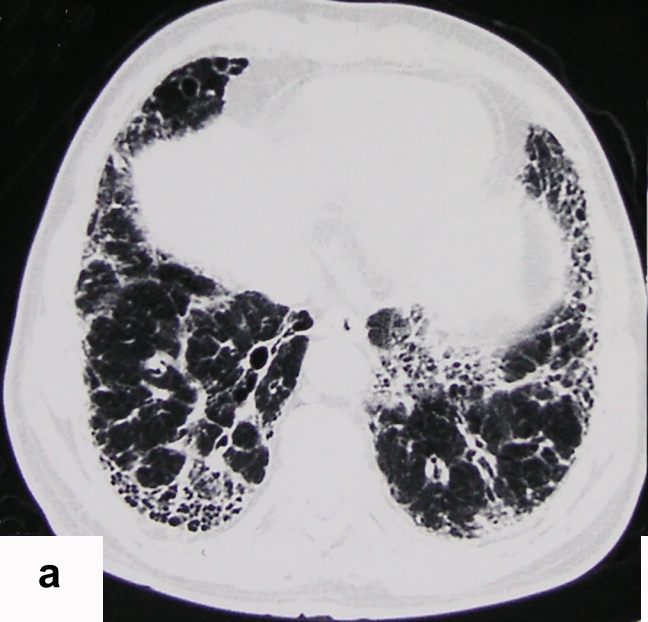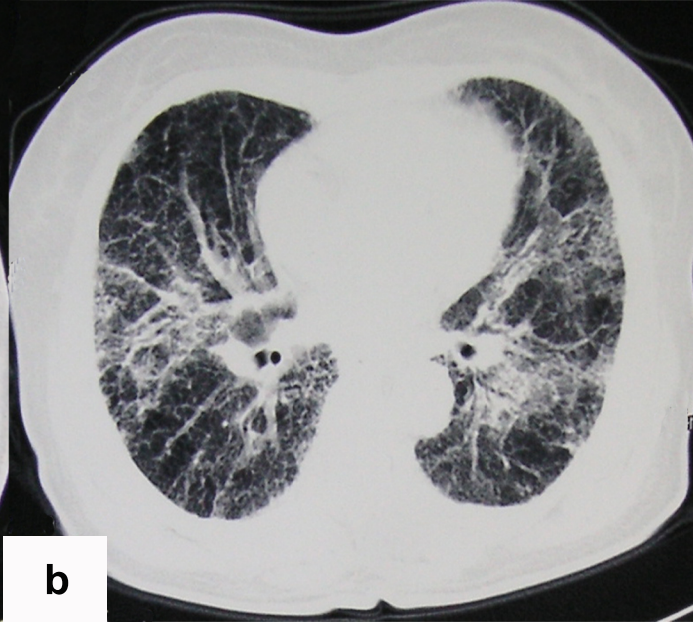

Supplement: 12890_2021_1451_MOESM1_ESM.pdf [file 12890_2021_1451_MOESM1_ESM.pdf]
